# Supplementary material for: The R369 Myosin Residue within Loop 4 Is Critical for Actin Binding and Muscle Function in Drosophila
Source: MDPI journal article supplement (doi:10.3390/ijms23052533), 2022-02-25
Supplement: s1 [file s1]

**Arg369 Missense Mutations in Striated Muscle Myosin Heavy Chain from the  
Genome Aggregation Database gnomAD v2.1.1**

| Human myosin heavy chain gene | Major muscle type expression [1]             | Arg369 equivalent mutations | Missense mutant alleles/alleles screened [2, 3] | Allele frequency in descending order [2, 3] |
|-------------------------------|----------------------------------------------|-----------------------------|-------------------------------------------------|---------------------------------------------|
| <i>MYH1</i>                   | Late fetal skeletal                          | Arg372His                   | 57/282794                                       | 2.02e-4                                     |
|                               |                                              | Arg372Cys                   | 42/282774                                       | 1.49e-4                                     |
| <i>MYH2</i>                   | Fetal skeletal                               | Arg372Ser                   | 1/31384                                         | 3.19e-5                                     |
|                               |                                              | Arg372His                   | 4/282840                                        | 1.41e-5                                     |
|                               |                                              | Arg372Gly                   | 2/251420                                        | 7.95e-6                                     |
|                               |                                              | Arg372Pro                   | 1/251440                                        | 3.98e-6                                     |
| <i>MYH3</i>                   | Embryonic & fetal skeletal                   | None                        |                                                 |                                             |
| <i>MYH4</i>                   | Post-natal skeletal                          | None                        |                                                 |                                             |
| <i>MYH6</i>                   | $\alpha$ -cardiac (atria)                    | Arg370Trp                   | 5/251328                                        | 1.99e-5                                     |
| <i>MYH7</i>                   | $\beta$ -cardiac (ventricles); slow skeletal | Arg369Trp                   | 1/251380                                        | 3.98e-6                                     |
| <i>MYH7B</i>                  | Specialized skeletal                         | None                        |                                                 |                                             |
| <i>MYH8</i>                   | Embryonic & fetal skeletal                   | Arg372His                   | 7/251458                                        | 2.78e-5                                     |
|                               |                                              | Arg372Cys                   | 4/251450                                        | 1.59e-5                                     |
|                               |                                              | Arg372Ser                   | 2/251450                                        | 7.95e-6                                     |
| <i>MYH13</i>                  | Extraocular skeletal                         | Arg371His                   | 2/251354                                        | 7.96e-6                                     |
|                               |                                              | Arg371Cys                   | 1/251302                                        | 3.98e-6                                     |
| <i>MYH15</i>                  | Specialized skeletal                         | None                        |                                                 |                                             |
| <i>MYH16</i>                  | Specialized skeletal                         | None                        |                                                 |                                             |

1. Schiaffino, S.; Rossi, A. C.; Smerdu, V.; Leinwand, L. A.; Reggiani, C., Developmental myosins: expression patterns and functional significance. *Skeletal Muscle* **2015**, 5, 22.

2. Karczewski, K. J.; Francioli, L. C.; Tiao, G. *et al.* The mutational constraint spectrum quantified from variation in 141,456 humans. *Nature* **2020**, 581, 434–443.

3. The Genome Aggregation Database: <https://gnomad.broadinstitute.org/>
